# Supplementary material for: Towards a functional hypothesis relating anti-islet cell autoimmunity to the dietary impact on microbial communities and butyrate production
Source: PubMed Central journal article supplement (PMC4845316; doi:10.1186/s40168-016-0163-4), 2016-04-26
Supplement: 40168_2016_163_MOESM5_ESM.pdf [file 40168_2016_163_MOESM5_ESM.pdf]

Supplementary Table 1

| Child ID | Cluster C1 | Cluster C2 | Cluster C3 | Age* (years) | Status  | Seroconv. age (years) | Max age (years) | Breast feeding* | Formula** | Potato** | Vegetable** | Fruit** | Meat** |
|----------|------------|------------|------------|--------------|---------|-----------------------|-----------------|-----------------|-----------|----------|-------------|---------|--------|
| 1        | G11        | G21        | G31        | 0.55         | Control | -                     | 8.16            | yes             | no        | no       | no          | no      | no     |
| 2        | G11        | G21        | G31        | 0.52         | Control | -                     | 3.22            | yes             | yes       | yes      | yes         | no      | no     |
| 3        | G11        | G21        | G31        | 0.49         | Control | -                     | 0.80            | -               | -         | no       | yes         | no      | no     |
| 4        | G11        | G21        | G32        | 0.4          | Control | -                     | 6.10            | yes             | no        | no       | no          | no      | no     |
| 5        | G11        | G21        | G32        | 0.29         | Control | -                     | 5.55            | no              | yes       | no       | no          | no      | no     |
| 6        | G11        | G21        | G33        | 0.52         | Case    | 0.80                  | 1.10            | yes             | -         | no       | yes         | no      | no     |
| 7        | G11        | G22        | G32        | 0.55         | Control | -                     | 4.12            | yes             | no        | yes      | yes         | no      | no     |
| 8        | G11        | G23        | G31        | 0.52         | Control | -                     | 6.12            | yes             | yes       | yes      | yes         | no      | no     |
| 9        | G11        | G23        | G32        | 0.53         | Case    | 1.53                  | 5.73            | yes             | no        | yes      | yes         | yes     | yes    |
| 10       | G11        | G23        | G32        | 0.53         | Case    | 2.02                  | 5.78            | no              | yes       | yes      | yes         | yes     | yes    |
| 11       | G11        | G23        | G32        | 0.5          | Case    | 2.55                  | 6.02            | yes             | no        | no       | no          | no      | no     |
| 12       | G11        | G23        | G32        | 0.52         | Control | -                     | 7.29            | no              | yes       | no       | yes         | yes     | no     |
| 13       | G11        | G23        | G33        | 0.55         | Case    | 3.02                  | 8.17            | no              | yes       | yes      | yes         | yes     | no     |
| 14       | G11        | G23        | G33        | 0.56         | Case    | 1.80                  | 5.67            | yes             | no        | yes      | yes         | no      | yes    |
| 15       | G11        | G23        | G33        | 0.59         | Case    | 1.89                  | 4.05            | -               | -         | yes      | yes         | yes     | -      |
| 16       | G11        | G23        | G33        | 0.52         | Control | -                     | 8.08            | yes             | no        | no       | yes         | no      | no     |
| 17       | G12        | G21        | G31        | 0.52         | Case    | 2.14                  | 3.22            | yes             | yes       | yes      | yes         | no      | no     |
| 18       | G12        | G21        | G32        | 0.5          | Control | -                     | 2.99            | yes             | no        | no       | no          | no      | no     |
| 19       | G12        | G21        | G33        | 0.53         | Case    | 1.26                  | 5.99            | yes             | no        | yes      | yes         | yes     | yes    |
| 20       | G12        | G21        | G33        | 0.59         | Case    | 1.51                  | 4.73            | yes             | no        | yes      | yes         | no      | yes    |
| 21       | G12        | G21        | G33        | 0.56         | Control | -                     | 7.97            | yes             | -         | yes      | yes         | yes     | yes    |
| 22       | G12        | G22        | G31        | 0.41         | Case    | 4.08                  | 8.45            | no              | yes       | no       | no          | no      | no     |
| 23       | G12        | G23        | G31        | 0.52         | Control | -                     | 6.15            | yes             | yes       | no       | yes         | no      | no     |
| 24       | G12        | G23        | G32        | 0.44         | Case    | 4.76                  | 7.62            | yes             | yes       | no       | no          | no      | no     |
| 25       | G13        | G22        | G31        | 0.52         | Case    | 0.75                  | 0.75            | -               | no        | yes      | yes         | yes     | yes    |
| 26       | G13        | G22        | G32        | 0.51         | Case    | 4.14                  | 5.23            | yes             | yes       | yes      | yes         | yes     | no     |
| 27       | G13        | G22        | G32        | 0.43         | Control | -                     | 4.04            | no              | yes       | yes      | yes         | yes     | yes    |
| 28       | G13        | G22        | G33        | 0.52         | Case    | 1.06                  | 6.53            | no              | yes       | yes      | yes         | yes     | yes    |
| 29       | G13        | G22        | G33        | 0.53         | Control | -                     | 2.83            | no              | yes       | yes      | yes         | yes     | yes    |
| 30       | G14        | G21        | G33        | 0.54         | Control | -                     | 7.13            | yes             | yes       | yes      | yes         | yes     | yes    |
| 31       | G14        | G22        | G31        | 0.64         | Control | -                     | 8.09            | no              | yes       | yes      | yes         | yes     | yes    |
| 32       | G14        | G22        | G31        | 0.52         | Control | -                     | 4.98            | no              | yes       | yes      | yes         | yes     | no     |
| 33       | G14        | G22        | G31        | 0.62         | Control | -                     | 4.13            | yes             | yes       | yes      | yes         | yes     | yes    |
| 34       | G14        | G22        | G33        | 0.59         | Case    | 4.02                  | 4.02            | no              | yes       | yes      | yes         | yes     | yes    |
| 35       | G14        | G22        | G33        | 0.47         | Case    | 0.72                  | 6.46            | no              | yes       | yes      | yes         | yes     | yes    |
| 36       | G14        | G23        | G31        | 0.63         | Control | -                     | 7.19            | yes             | no        | yes      | yes         | yes     | yes    |
| 37       | G14        | G23        | G33        | 0.62         | Case    | 0.76                  | 0.99            | -               | no        | yes      | yes         | no      | no     |
| 38       | G14        | G23        | G33        | 0.62         | Case    | 1.03                  | 5.28            | no              | yes       | yes      | yes         | yes     | -      |
| 39       | G14        | G23        | G33        | 0.54         | Control | -                     | 4.53            | -               | -         | yes      | yes         | no      | yes    |
| 40       | G14        | G23        | G33        | 0.65         | Control | -                     | 4.06            | no              | yes       | yes      | yes         | yes     | yes    |

(\*) at sampling time

(\*\*) introduced before sampling time
